# Supplementary material for: PyXRD v0.6.7: a free and open-source program to quantify disordered phyllosilicates using multi-specimen X-ray diffraction profile fitting
Source: Copernicus journal article supplement (doi:10.5194/gmd-9-41-2016), 2016-01-15
Supplement: Supplementary file [file gmd-9-41-2016-supplement-title-page.pdf › gmd-9-41-2016-supplement-title-page.pdf]

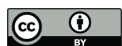

## *Supplement of*

# **PyXRD v0.6.7: a free and open-source program to quantify disordered phyllosilicates using multi-specimen X-ray diffraction profile fitting**

**M. Dumon and E. Van Ranst**

*Correspondence to:* M. Dumon (mathijs.dumon@ugent.be)

- gmd-9-41-2016-supplement-title-page.pdf
- Supplements
  - Manual.pdf
  - Model validation files
    - \* Single phases comparison
    - \* Sybilla project - Mixture 1
    - \* Sybilla project - Mixture 2
    - \* Sybilla project - Mixture 3
    - \* Sybilla project - Mixture 4
    - \* Sybilla project - Mixture 5
  - Multi-speciment test files
    - \* Assemblage 1
    - \* Assemblage 2
    - \* Assemblage 3
    - \* Assemblage 4
  - PyXRD-0.6.7
    - \* .gitattributes
    - \* .gitignore
    - \* LICENSE
    - \* README.md
    - \* ez\_setup.py
    - \* mvc
    - \* pyxrd
    - \* run.py
    - \* setup.py
  - README.rts

The copyright of individual parts of the supplement might differ from the CC-BY 3.0 licence.
